# Supplementary material
Source: PubMed Central journal article supplement (PMC4620890)
Supplement: pnas.1506129112.sapp.pdf [file pnas.1506129112.sapp.pdf]

## Supplementary Figure Legends

**Supplementary Figure 1 - Quantitative PCR.** A scatterplot of human *ND4* relative to endogenous mouse *ND4* in the heart, liver, brain, skeletal muscle, spinal cord and lung.

**Supplementary Figure 2- Immunofluorescence of ocular transgene expression.** Confocal micrographs of longitudinal sections of transgenic mice retinas with perinuclear mCherry (A) and mutND4FLAG (B), VDAC/porin (C-D), mCherry and porin (E) mutND4FLAG and porin (F), Thy1.2 labeled RGCs (G-H). Scale bar = 50  $\mu$ m, RGC = retinal ganglion cell layer, INL = inner nuclear layer

**Supplementary Figure 3 - Immunofluorescence of extraocular transgene expression.** Confocal micrographs of mCherry, Thy1.2 and porin immunolabeling of transgenic mouse optic nerve (A), brain (B), heart (C), liver (D) and skeletal muscle (E). Scale bar = 80  $\mu$ m

**Supplementary Figure 4 - Ultrastructure of extraocular tissues.** Transmission electron micrograph of the brain (A), heart (B), and skeletal muscle (C) of transgenic mutND4 mice.

**Supplementary Figure 5 - Oxidative phosphorylation and stress.** Confocal micrographs of mutant ND4 transgenic mice vitreally injected with 2',7'-dichlorofluorescein diacetate (DCFDA) shows green fluorescence in the presence of endogenous reactive oxygen species (A-B) and a normal control (C). Endogenous mCherry autofluorescence in transgenic mice (D-E) and absence in a control (F). Merged panels of DCFDA and mCherry (G-H). A bar plot of cells in the RGC layer positive for DCFDA (I). Bar plots of complex I activity (J) and the rate of ATP synthesis in transgenic mice relative to control optic nerves (K). Scale bar = 20  $\mu$ m, RGC = retinal ganglion cell layer, IPL = inner plexiform layer, INL = inner nuclear layer

**Supplementary Figure 6 – MRI.** MRI of the brains of transgenic mutant ND4 mice (A, B, C) and normal mice (D, E, F).

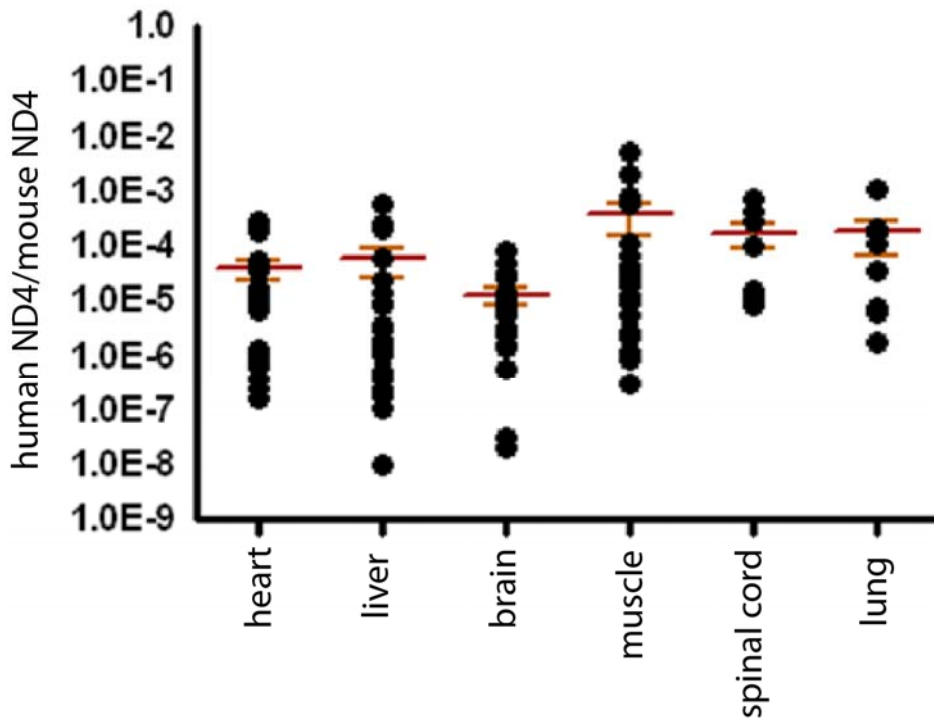

Supplementary Fig. 1

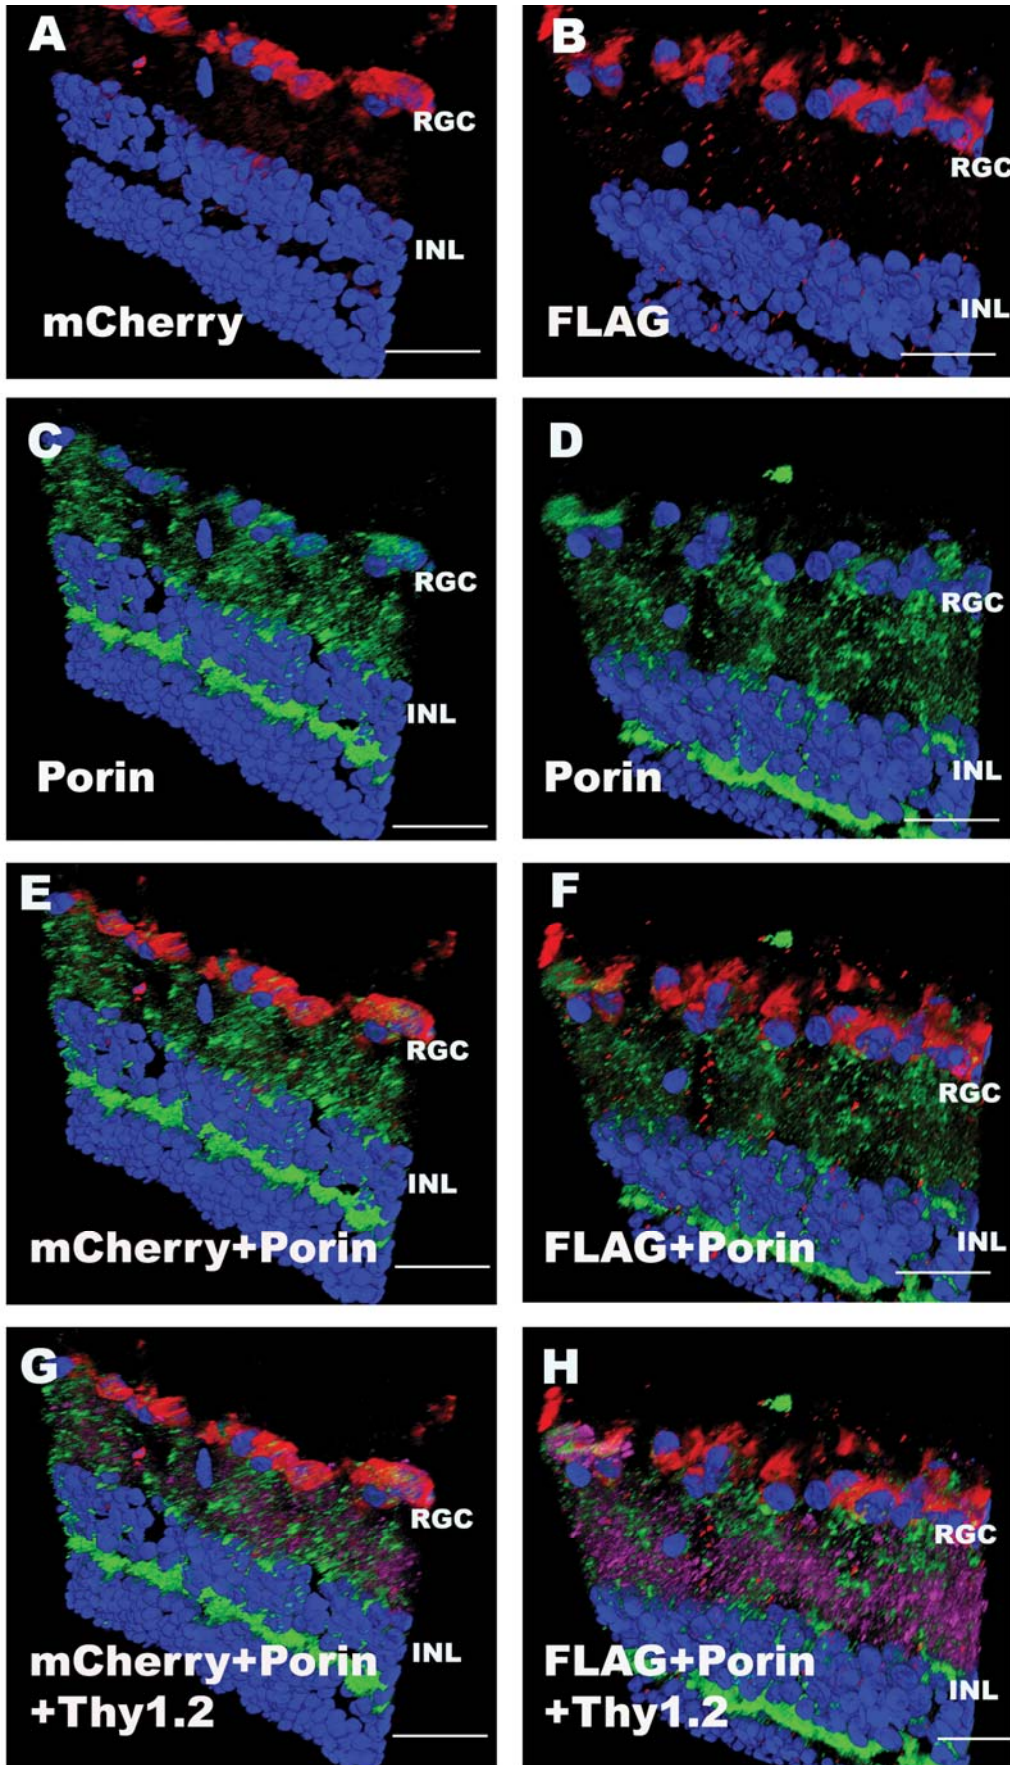

Suppl Fig.2

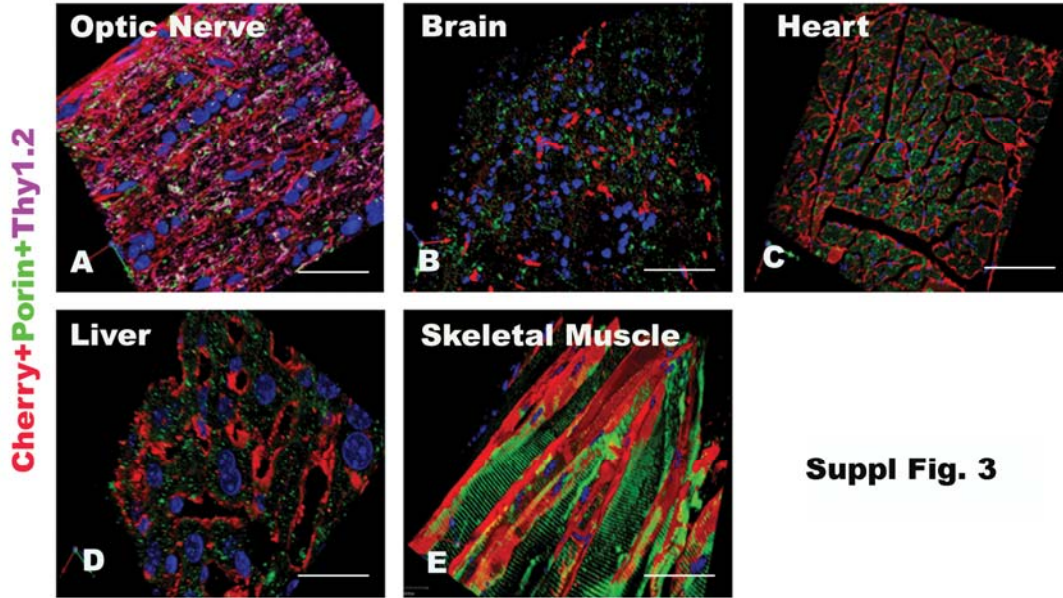

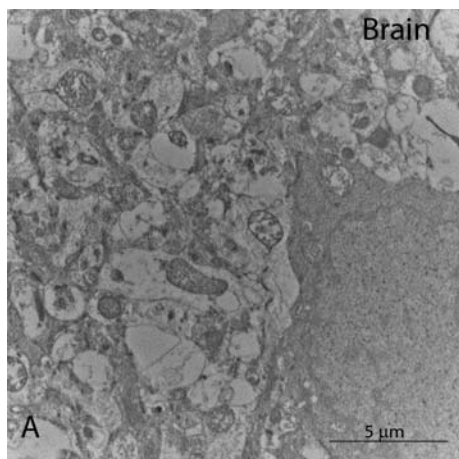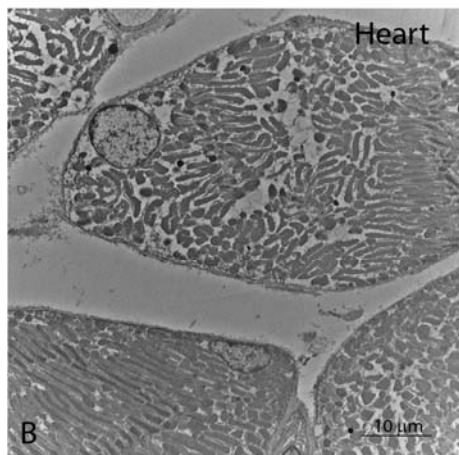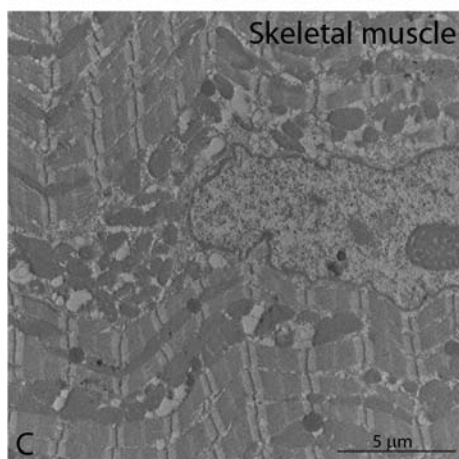

**Suppl Fig. 4**

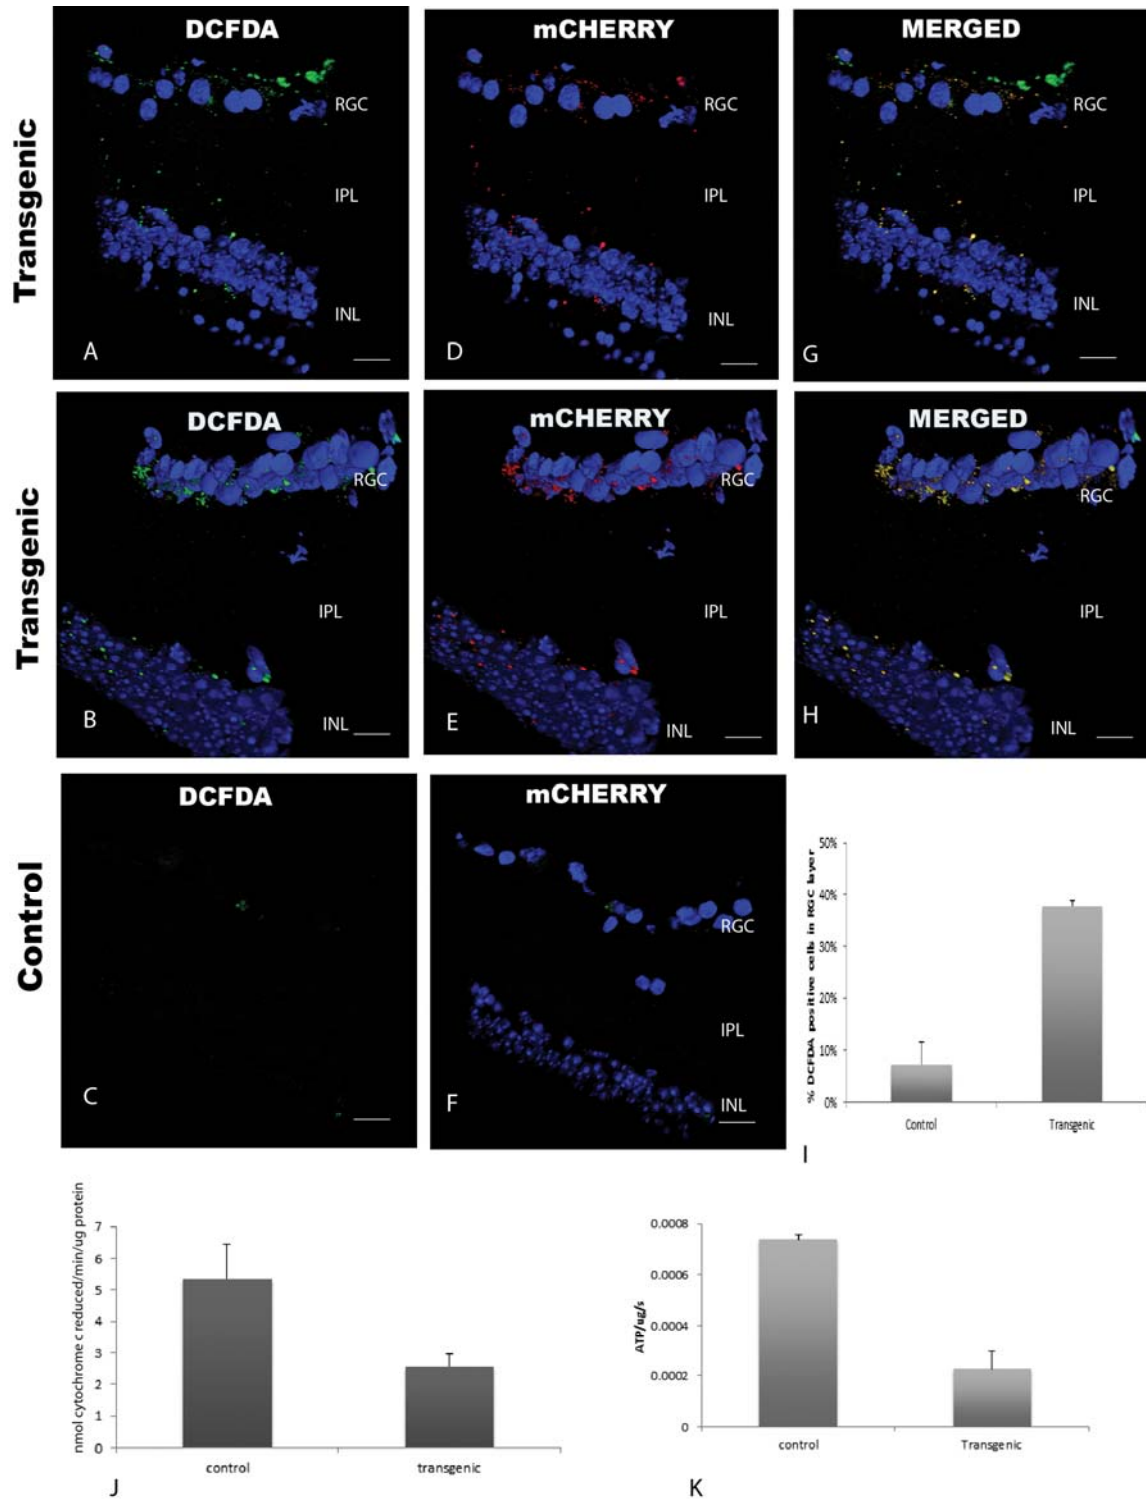

**Supple Fig. 5**

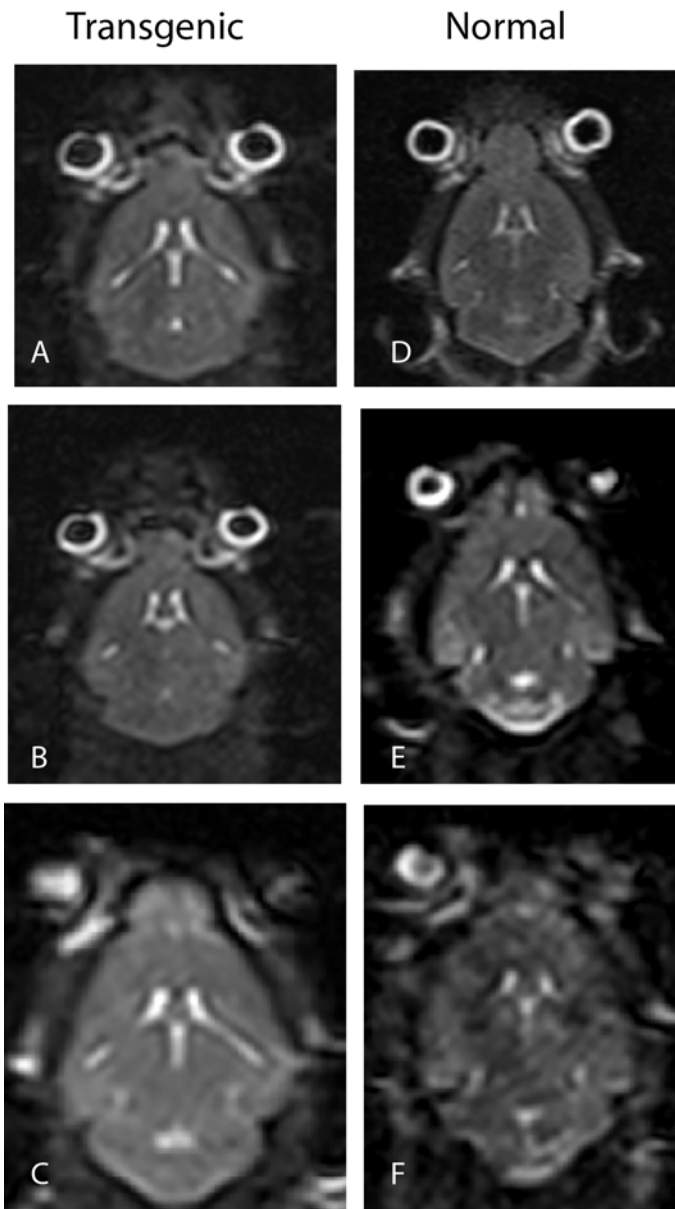

Supplementary Figure 6
